# Supplementary material
Source: PubMed Central journal article supplement (PMC3092431)
Supplement: NIHMS288098-supplement-Supplementary_Table_1.pdf [file NIHMS288098-supplement-Supplementary_Table_1.pdf]

**Supplementary Table 1. Modifiers of *hop<sup>Tum-1</sup>* tumorigenesis**

| Modifier of <i>Tum-1</i>                             | Allele tested              | Tumor Index | Protein product/function               | Category                         |
|------------------------------------------------------|----------------------------|-------------|----------------------------------------|----------------------------------|
| <i>E(tum-1)</i>                                      |                            |             |                                        |                                  |
| <i> Tp(3;Y)ry506-85C</i>                             | --                         | 1.89±0.16   | --                                     | --                               |
| <i> unchained</i>                                    | <i> unch[k15501]</i>       | 1.74±0.19   | Unknown                                | --                               |
| <i> TBP-associated factor 1</i>                      | <i> Taf1[1]</i>            | 1.63±0.06   | TAFII-230 TBP-binding                  | Transcription                    |
| <i> Df(2R)H3C1</i>                                   | --                         | 1.58±0.09   | --                                     | --                               |
| <i> Cdc27</i>                                        | <i> Cdc27[L7123]</i>       | 1.45±0.05   | Cell cycle                             | Cell cycle                       |
| <i> abnormal wing discs</i>                          | <i> awd[j2A4]</i>          | 1.42±0.06   | nm23-H1; Nucleoside-diphosphate kinase | Metabolism                       |
| <i> Ets at 97D</i>                                   | <i> Ets97D[tne-4]</i>      | 1.39±0.12   | Winged-helix DNA binding domains       | Transcription                    |
| <i> spindle E</i>                                    | <i> spn-E[1]</i>           | 1.38±0.08   | DEAD-box helicase; RNAi component      | Chromatin modification           |
| <i> HEM-protein</i>                                  | <i> Hem[03335]</i>         | 1.34±0.09   | Receptor binding; Cell shape           | Cytoskeleton                     |
| <i> Toll</i>                                         | <i> Tl[r4]</i>             | 1.33±0.04   | Cytokine receptor                      | Signaling                        |
| <i> sallimus</i>                                     | <i> sls[1]</i>             | 1.31±0.08   | Myosin-light-chain kinase activity     | Cytoskeleton                     |
| <i> Krüppel</i>                                      | <i> Kr[1]</i>              | 1.29±0.16   | Zinc finger, transcription repressor   | Transcription                    |
| <i> plume</i>                                        | <i> plume[k00308]</i>      | 1.28±0.11   | Unknown                                | --                               |
| <i> rhino</i>                                        | <i> rhi[02086]</i>         | 1.24±0.12   | Chromodomain; chromatin-binding        | Chromatin modification           |
| <i> Suppressor of variegation 2-5</i>                | <i> Su(var)205[5]</i>      | 1.18±0.06   | Heterochromatin Protein 1 (HP1)        | Chromatin modification           |
| <i> Rpd3</i>                                         | <i> Rpd3[04556]</i>        | 1.17±0.08   | HDAC                                   | Chromatin modification           |
| <i> bellwether</i>                                   | <i> blw[1]</i>             | 1.07±0.06   | Mitochon. ATP synthase                 | Metabolism                       |
| <i> knirps</i>                                       | <i> kni[6]</i>             | 0.98±0.07   | Transcription factor                   | Transcription                    |
| <i> Suppressor of variegation 3-4</i>                | <i> Su(var)3-4[1]</i>      | 0.94±0.04   | Unknown                                | Chromatin modification           |
| <i> moira</i>                                        | <i> mor[1]</i>             | 0.93±0.06   | Chromatin binding; brahma complex      | Chromatin modification           |
| <i> hairy</i>                                        | <i> h[08247]</i>           | 0.91±0.07   | HLH transcriptional repressor          | Transcription                    |
| <i> labial</i>                                       | <i> lab[4]</i>             | 0.91±0.06   | Homeodomain, transcription             | Transcription                    |
| <i> polo</i>                                         | <i> polo[01673]</i>        | 0.89±0.05   | Kinase, cell division                  | Cell cycle                       |
| <i> Deformed</i>                                     | <i> Dfd[6]</i>             | 0.88±0.05   | Homeodomain, transcription             | Transcription                    |
| <i> Enhancer of bithorax</i>                         | <i> E(bx)[ry122]</i>       | 0.87±0.21   | NURF complex                           | Chromatin modification           |
| <i> Vacuolar H<sup>+</sup>-ATPase 55kD B subunit</i> | <i> Vha55[j2E9]</i>        | 0.85±0.13   | H <sup>+</sup> -ATPase                 | Metabolism                       |
| <i> gooseberry</i>                                   | <i> gsb[01155]</i>         | 0.84±0.06   | Homeodomain, transcription             | Transcription                    |
| <i> Protein tyrosine phosphatase 69D</i>             | <i> Ptp69D[1]</i>          | 0.84±0.04   | Tyrosine phosphatase                   | Signaling                        |
| <i> Suppressor of variegation 3-9</i>                | <i> Su(var)3-9[1]</i>      | 0.83±0.03   | Histone H3-K9 methyltransferase        | Chromatin modification           |
| <i> domino</i>                                       | <i> dom[k08108]</i>        | 0.82±0.03   | SNF2-related ATPase                    | Chromatin modification           |
| <i> piwi</i>                                         | <i> piwi[06843]</i>        | 0.82±0.04   | RNAi component                         | Chromatin modification           |
| <i> Suppressor of variegation 2-10</i>               | <i> Su(var)2-10[03697]</i> | 0.80±0.04   | PIAS; nuclear lamina component         | Signaling/Chromatin modification |
| <i>Su(Tum-1)</i>                                     |                            |             |                                        |                                  |
| <i> even skipped</i>                                 | <i> eve[3]</i>             | 0.08±0.02   | Homeodomain                            | Transcription                    |
| <i> baboon</i>                                       | <i> babo[32]</i>           | 0.02±0.01   | Activin Type I receptor                | Signaling                        |
| <i> Serrate</i>                                      | <i> Ser[VX82]</i>          | 0.01±0.00   | Notch ligand                           | Signaling                        |
| <i> Df(3L)Exel6111</i>                               | --                         | 0.00±0.00   | --                                     | --                               |
| <i> lethal with a checkpoint kinase</i>              | <i> lack[KG07014]</i>      | 0.00±0.00   | Smurf, HECT Ubiquitin ligase           | Signaling                        |

*hop<sup>Tum-1</sup>/FM7* females were mated to *mutant/Balancer* males. Mutant alleles used for testing are listed in column 2. Tumor indices were calculated from *hop<sup>Tum-1</sup>/+*; *mutant/+* F1 progeny flies. “—” indicates functions or candidate genes are unknown.
